# Supplementary material for: Nutritional Profile and Dietary Patterns of Lebanese Non-Alcoholic Fatty Liver Disease Patients: A Case-Control Study
Source: MDPI journal article supplement (doi:10.3390/nu9111245), 2017-11-14
Supplement: s1 [file s1]

Supplemental file

**Bland Altman plots generated for the percentage of energy from the three macronutrients (FFQ and the mean of the two 24 hours recalls)**

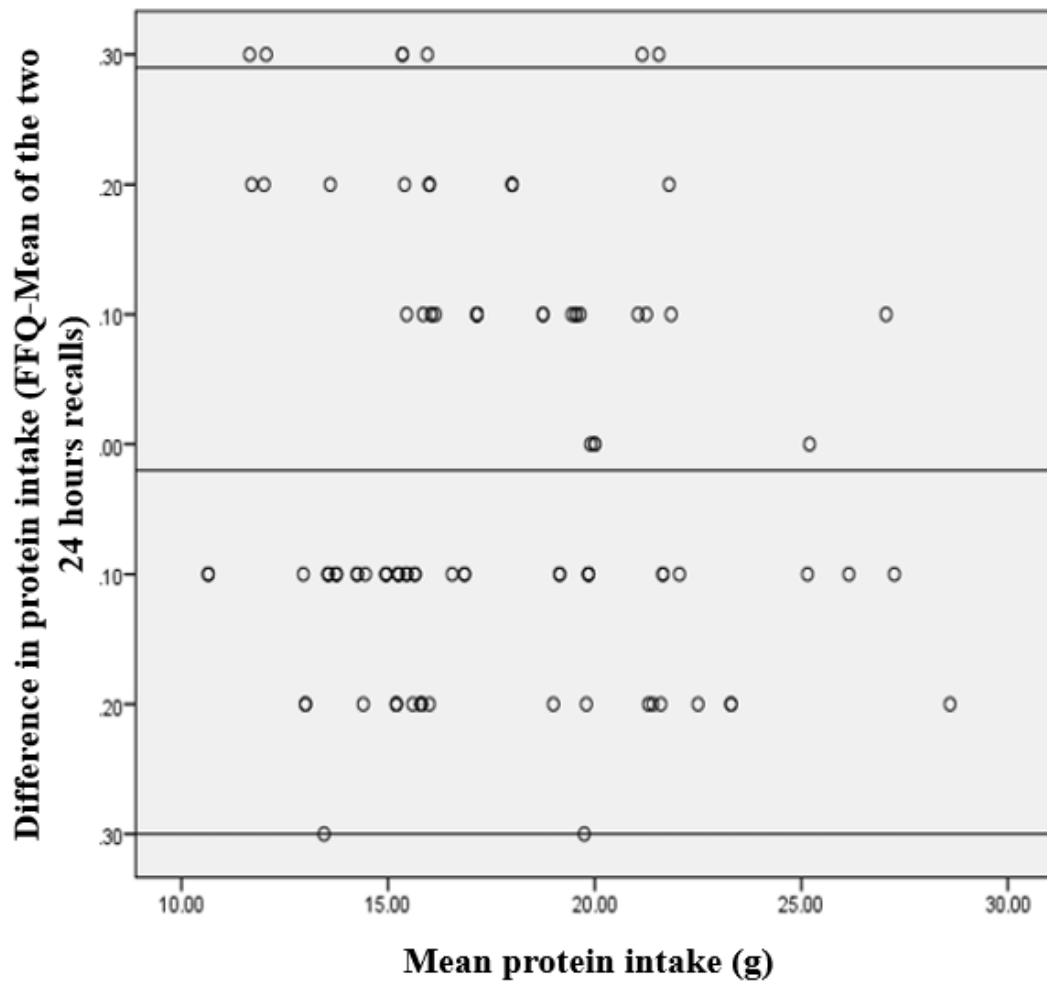

Figure S1. Results of the Bland Altman analyses (% of energy from protein). The difference in intake between the FFQ and the mean of the two dietary recalls is plotted on the Y axis and the mean intake from the two tools is presented on the X axis. Most data points are clustered between the lower and upper limit

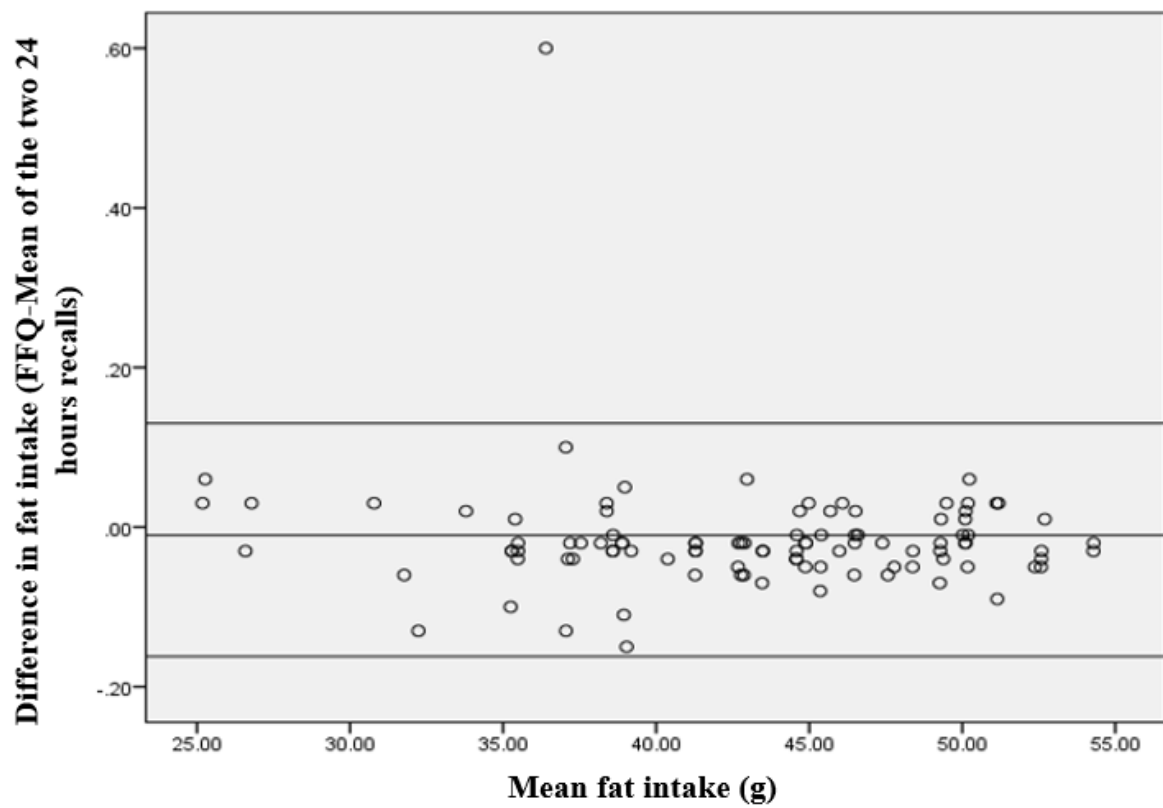

Figure S2. Results of the Bland Altman analyses (% of energy from fat). The difference in intake between the FFQ and the mean of the two dietary recalls is plotted on the Y axis and the mean intake from the two tools is presented on the X axis. Most data points are clustered between the lower and upper limit

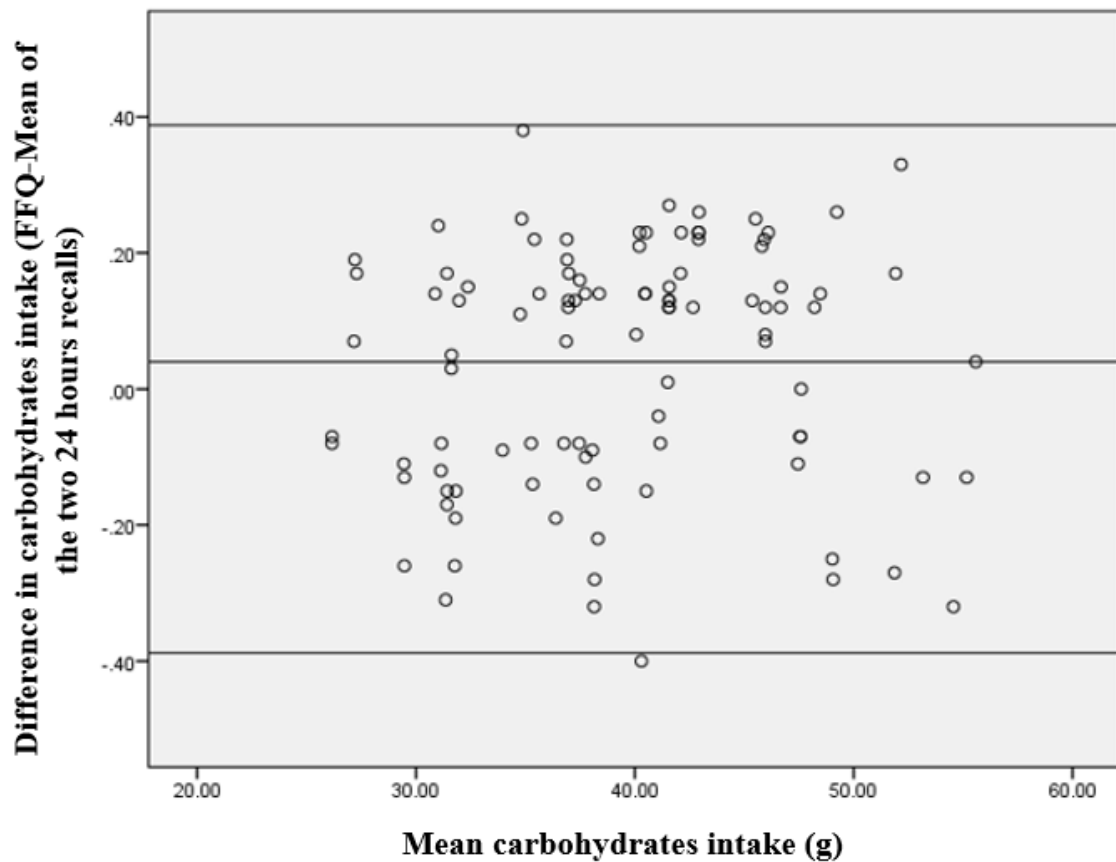

Figure S3. Results of the Bland Altman analyses (% of energy from carbohydrates). The difference in intake between the FFQ and the mean of the two dietary recalls is plotted on the Y axis and the mean intake from the two tools is presented on the X axis. Most data points are clustered between the lower and upper limit

Table S1: Food Group

| Food Group                                 | Included Food                                                                                                                                                                                                                                              |
|--------------------------------------------|------------------------------------------------------------------------------------------------------------------------------------------------------------------------------------------------------------------------------------------------------------|
| <b>Vegetables</b>                          | Tomatoes, tomato juice, tomato sauce, broccoli, cauliflower, cabbage, carrots raw or cooked, corn, onions as a garnish or in salad or cooked, peppers, eggplant, zucchini or summer squash, spinach cooked or raw, icebergs or leaf lettuce                |
| <b>Chickpeas, red beans, lentils, peas</b> | Fresh chickpeas, red beans, fresh lentils, peas                                                                                                                                                                                                            |
| <b>Fruits and fruit juices</b>             | Bananas, raisins, grapes, apples, pears, prunes, dried plums, oranges, fresh strawberries, peaches, figs, grapefruit, grapefruit juices, apricots, orange juice or other fruit juices, dates (Mejdool), avocado, cantaloupe, watermelon, cherry, raspberry |
| <b>Vegetable oil/olives</b>                | Vegetable oil, tahini, olives                                                                                                                                                                                                                              |
| <b>Fish and sea food</b>                   | Fish, tuna steak, canned tuna, shrimps, lobster                                                                                                                                                                                                            |

|                                             |                                                                                  |
|---------------------------------------------|----------------------------------------------------------------------------------|
| <b>Almonds, walnuts, hazelnuts, sesames</b> | Almonds, walnuts or other nuts                                                   |
| <b>Desserts, arabic pastries</b>            | Dark chocolate, doughnuts, cake or pie (homemade or ready-made), Arabic pastries |
| <b>Beef meat</b>                            | Beef steak or roast                                                              |
| <b>Hamburger</b>                            | Hamburger                                                                        |
| <b>Fries</b>                                | fries                                                                            |
| <b>Pork</b>                                 | Pork, bacon                                                                      |
| <b>Pizza</b>                                | Pizza                                                                            |
| <b>Spaghetti or noodles or cooked rice</b>  | Spaghetti or noodles, cooked brown or white rice                                 |
| <b>Chicken</b>                              | Chicken or turkey sandwich                                                       |
| <b>Carbonated beverages</b>                 | Coke, carbonated beverage                                                        |
| <b>Pies, fatayer</b>                        | Pies, fatayer (kind of pies)                                                     |
| <b>1 chicken egg</b>                        | 1 chicken egg                                                                    |
| <b>Fresh cream</b>                          | Cream, non-dairy coffee whitener                                                 |
| <b>Mayonnaise or mustard</b>                | Mayonnaise or mustard                                                            |
| <b>Ketchup</b>                              | Ketchup                                                                          |
| <b>Chips</b>                                | Chips                                                                            |
| <b>Hot dog</b>                              | Hot dog                                                                          |
| <b>Energy drink</b>                         | Energy drink                                                                     |
| <b>Ham</b>                                  | Ham                                                                              |
| <b>Milk chocolate</b>                       | Milk chocolate                                                                   |

*Questionnaire of the study: Nutritional profile of NAFLD Lebanese patients: a case control study*

*Date dd/mm/yy*

*These questions are designed to be filled or to be circled according to the appropriate answer*

**Identification number.....**

**Phone Number.....**

### **1. Socio-demographic variables**

1) Nationality.....

2) Place of residency.....

3) Place of birth.....

4) Age: .....

5) Gender: 1. Female 2. Male

6) Marital Status: 1. Never married 2. Married 3. Divorced 4. Widowed

7) Since how many years (widowed)? .....

8) Number of child: 1. More than 4 2. 2 - 4 3. Less than 2 4. No children

9) Number of co-residents by room: .....

10) Occupation: 1. Self-employed 2. Employed 3. Unemployed 4. Retired

5. others

11) Education:                      1. Illiterate      2. Primary      3. Secondary      4. University

**2. Anthropometric measurements**

- 1) Height (cm).....
- 2) Weight (Kg).....
- 3) BMI (Kg/m<sup>2</sup>) .....
- 4) Waist circumference (cm).....
- 5) Waist circumference /Hip circumference (cm).....

**3. Arterial pressure (mm Hg) - Systolic/Diastolic:**

**4. Blood tests (fasting state)**

- 1) Cholesterol (mmol/L)
- 2) LDL-Ct (mmol/L)
- 3) HDL-Ct (mmol/L)
- 4) Triglycerides (mmol/L)
- 5) Glycemia (mmol/L)
- 6) Serum insulin (U/l)

**5. Food consumption patterns:**

**1) How many meals/day?**

- 1) 1 meal
- 2) 2 to 3 meals
- 3)  $\geq 4$  meals
- 4) More

**2) Number of fried food away from home or Fast food/week:**

- 1) Less than once/week
- 2) 1 to 3 times per week
- 3) 4-6 times per week
- 4) Daily

**3) Raw or cooked vegetables (serving/day):**

- 1) Less than 2 servings
- 2) 2-3 servings
- 3) More than 3 servings

**4) How often do you eat food that is fried at home?**

- 1) Less than once/week
- 2) 1-3 times per week
- 3) 4-6 times per week
- 4) Daily

**5) Kind of fat used for cooking or baking:**

- 1) Butter
- 2) Margarine
- 3) Vegetable oil
- 4) Two of them
- 5) Three of them

**6) What kind of oil is usually used for frying or baking at home (Sunflower oil, olive oil, Canola oil, Soya oil, etc.?)**

**7) What kind of oil is usually used for salad dressings at home (Colza oil, olive oil, Canola oil, nut oil, etc.?)**

**8) Kind of milk or dairy products consumed:**

- 1) Whole
- 2) 2% or 1%
- 3) Skim milk or dairy products
- 4) Others (soya milk, rice milk)

**9) Kind of meat consumed:**

- 1) Pork
- 2) Mutton
- 3) Veal
- 4) Chicken
- 5) Fish
- 6) Seafood
- 7) Goat

**10) Kind of bread consumed:**

- 1) Refined wheat bread
- 2) Whole wheat bread
- 3) Others

**11) Kind of sugar consumed:**

- 1) Table sugar
- 2) Sweeteners
- 3) No sugar

**12) How many teaspoons of sugar do you add to your beverages or food/day? ...**

- 1) None
- 2) 1-2 teaspoons
- 3) 3-4
- 4) 5 or more

13) **How often do you consume chocolate, candy bars, molasses, jams and jellies, syrup, honey/week?**

- 1) Never
- 2) 1 to 2 times/week
- 3) 3-5 times/week
- 4) More

6. **Did you smoke cigarettes, cigars, pipes, water pipes, cigarillos in the last six months?**

- 1) Yes
- 2) No

7. **If Yes, how many cigarettes or cigars /day** (in case of cigarettes or cigars smoking):

- 1) 1-4
- 2) 5-14
- 3) 15-24
- 4) 25-34
- 5) 35-44
- 6) 45+

8. **If Yes, how many water pipes /week** (in case of water pipes smoking):

- 1) 1 per week
- 2) 2-3 per week
- 3) >3 per week

9. **Are you exposed to smoke more than 4 hours per day?**

- 1) Yes
- 2) No

10. **Physical activity:**

1. Yes 2. No

**Kind and frequency of physical activity:**

- |                                                               |              |
|---------------------------------------------------------------|--------------|
| 1) Walking at a moderate pace                                 | 1. Yes 2. No |
| 2) How often/week/day .....                                   |              |
| 3) Jogging or running                                         | 1. Yes 2. No |
| 4) How often/week/day .....                                   |              |
| 5) Swimming, bicycling, tennis, aerobic dance                 | 1. Yes 2. No |
| 6) How often/week/day .....                                   |              |
| 7) Body building, boxing, football game, ski or stair machine | 1. Yes 2. No |
| 8) How often/week/day .....                                   |              |
| 9) Other vigorous activities (squash, lifting heavy objects)  | 1. Yes 2. No |
| 10) How often/week/day .....                                  |              |

- 11) Gardening or lawn mowing 1. Yes 2. No  
 12) How often/week/day .....  
 13) Moderate activities such as general home exercise; pushing a vacuum cleaner, ironing, carrying groceries, climbing stairs) 1. Yes 2. No  
 14) How often/week/day  
 15) Other: 1. Yes 2. No  
 16) How often/week/day .....

**11. Have you had any of this clinician -diagnosed illnesses?**

- 1) Diabetes mellitus (type 2)
- 2) Cardiovascular disease such as Myocardial infarction, coronary bypass, stroke
- 3) Hypertension
- 4) 1+2
- 5) 1+2+3
- 6) 2+3
- 7) Others

**12. Are you taking any regular medication?**

1. Yes 2. No

If Yes, which of the following are you taking?

- 1) Cholesterol lowering drugs (Statin)
- 2) Triglycerides lowering drugs
- 3) Hypoglycemic drugs
- 4) Anti-hypertensive drugs
- 5) Female hormones
- 6) Others

**13. Days/week**

- 1) 1
- 2) 2-3
- 3) 4-5
- 4) 6+

**14. Do you currently take multi-vitamins?**

1. Yes 2. No

If Yes, how many tablets/per week (for the last six months)?

- 1) 2 or less
- 2) 3-5
- 3) 6-9
- 4) 10 or more

**15.** If you are currently taking them, what brand do you usually use and the exact dose/day (Specify)? .....

**16. Do you currently take supplements?** (such as fish oil or others)      1. Yes   2. No

If Yes, how many tablets/per week (for the last six months)

- 1) 2 or less
- 2) 3-5
- 3) 6-9
- 4) 10 or more

**17.** If you are currently taking them, what brand do you usually use and the exact dose/day (Specify)? .....

**18. Do you ever follow a specific diet?**      1. Yes   2. No

If Yes, what type of diet?

- 1) High protein diet
- 2) Others

## 19. Family history of disease

1) 1. Yes    2. No

2) If Yes, tick the appropriate box

|            | <b>Excess in weight/<br/>Obesity</b> | <b>Type 2 Diabetes</b> | <b>Dyslipidemia<br/>or Hypertension or both</b> | <b>CVD</b> | <b>Fatty liver</b> |
|------------|--------------------------------------|------------------------|-------------------------------------------------|------------|--------------------|
| Father     |                                      |                        |                                                 |            |                    |
| Mother     |                                      |                        |                                                 |            |                    |
| Brother/s  |                                      |                        |                                                 |            |                    |
| Sister/s   |                                      |                        |                                                 |            |                    |
| Daughter/s |                                      |                        |                                                 |            |                    |

**Food Frequency Questionnaire**

\*For each food listed, indicate how often on average you have used the amount specified during the past year

**Identification number**.....

|                                                                    |              | Average use last year             |               |            |              |              |           |             |             |             |
|--------------------------------------------------------------------|--------------|-----------------------------------|---------------|------------|--------------|--------------|-----------|-------------|-------------|-------------|
| Daily products                                                     |              | Never or less than once per month | 1-3 per month | 1 per week | 2-4 per week | 5-6 per week | 1 per day | 2-3 per day | 4-5 per day | 6 + per day |
| Milk (240ml)                                                       | Skim milk    |                                   |               |            |              |              |           |             |             |             |
|                                                                    | Whole milk   |                                   |               |            |              |              |           |             |             |             |
|                                                                    | 1 or 2% milk |                                   |               |            |              |              |           |             |             |             |
|                                                                    | Soy milk     |                                   |               |            |              |              |           |             |             |             |
| Cream, non-dairy coffee whitener (exclude fat free) (1 tablespoon) |              |                                   |               |            |              |              |           |             |             |             |
| Yogurt (113-170g)                                                  | Whole        |                                   |               |            |              |              |           |             |             |             |
|                                                                    | Skim         |                                   |               |            |              |              |           |             |             |             |
|                                                                    | Sweetened    |                                   |               |            |              |              |           |             |             |             |
| Cottage cheese [halloum, feta, mozzarella (45g)]                   | Whole        |                                   |               |            |              |              |           |             |             |             |
|                                                                    | Skim         |                                   |               |            |              |              |           |             |             |             |
|                                                                    | 1 or 2%      |                                   |               |            |              |              |           |             |             |             |
| French cheese (45g) or other cheese (Cheddar, American, etc.,)     |              |                                   |               |            |              |              |           |             |             |             |
| Labneh (45-50g)                                                    | Whole        |                                   |               |            |              |              |           |             |             |             |
|                                                                    | Skim         |                                   |               |            |              |              |           |             |             |             |
|                                                                    | 1 or 2%      |                                   |               |            |              |              |           |             |             |             |

| <b>Fruits</b>                                       | <b>Never or<br/>less than<br/>once per<br/>month</b> | <b>1-3 per<br/>month</b> | <b>1 per week</b> | <b>2-4 per<br/>week</b> | <b>5-6 per<br/>week</b> | <b>1 per day</b> | <b>2-3 per<br/>day</b> | <b>4-5 per day</b> | <b>6 + per day</b> |
|-----------------------------------------------------|------------------------------------------------------|--------------------------|-------------------|-------------------------|-------------------------|------------------|------------------------|--------------------|--------------------|
| Bananas (1)                                         |                                                      |                          |                   |                         |                         |                  |                        |                    |                    |
| Raisins or grapes (1/2 cup)                         |                                                      |                          |                   |                         |                         |                  |                        |                    |                    |
| Apples or pears (1)                                 |                                                      |                          |                   |                         |                         |                  |                        |                    |                    |
| Prunes or dried plums (¼ cup or 6 dried)            |                                                      |                          |                   |                         |                         |                  |                        |                    |                    |
| Oranges (1)                                         |                                                      |                          |                   |                         |                         |                  |                        |                    |                    |
| Strawberries, fresh (1/2 cup)                       |                                                      |                          |                   |                         |                         |                  |                        |                    |                    |
| Peaches (1)                                         |                                                      |                          |                   |                         |                         |                  |                        |                    |                    |
| Figs (2)                                            |                                                      |                          |                   |                         |                         |                  |                        |                    |                    |
| Grapefruit (1/2) or grapefruit juices (small glass) |                                                      |                          |                   |                         |                         |                  |                        |                    |                    |
| Apricots (1 fresh, ½ cup canned or 5 dried)         |                                                      |                          |                   |                         |                         |                  |                        |                    |                    |
| Orange juice (small glass) or other fruit juices    |                                                      |                          |                   |                         |                         |                  |                        |                    |                    |
| Dates (Mejdool) (2)                                 |                                                      |                          |                   |                         |                         |                  |                        |                    |                    |
| Avocado (1/2 fruit)                                 |                                                      |                          |                   |                         |                         |                  |                        |                    |                    |
| Cantaloupe (1/4 melon) or watermelon (400g)         |                                                      |                          |                   |                         |                         |                  |                        |                    |                    |
| Cherry (A dozen)                                    |                                                      |                          |                   |                         |                         |                  |                        |                    |                    |
| Raspberry (1 cup)                                   |                                                      |                          |                   |                         |                         |                  |                        |                    |                    |
| Others                                              |                                                      |                          |                   |                         |                         |                  |                        |                    |                    |
| <b>Vegetables</b>                                   |                                                      |                          |                   |                         |                         |                  |                        |                    |                    |
| Tomatoes (2 slices)                                 |                                                      |                          |                   |                         |                         |                  |                        |                    |                    |
| Tomato juice (small glass)                          |                                                      |                          |                   |                         |                         |                  |                        |                    |                    |
| Tomato sauce (small glass)                          |                                                      |                          |                   |                         |                         |                  |                        |                    |                    |

|                                                               |                                          |                      |                   |                     |                     |                  |                    |                    |                    |
|---------------------------------------------------------------|------------------------------------------|----------------------|-------------------|---------------------|---------------------|------------------|--------------------|--------------------|--------------------|
| Broccoli (1/2 cup)                                            |                                          |                      |                   |                     |                     |                  |                    |                    |                    |
| Cauliflower (1/2 cup)                                         |                                          |                      |                   |                     |                     |                  |                    |                    |                    |
| Cabbage (1/2 cup)                                             |                                          |                      |                   |                     |                     |                  |                    |                    |                    |
| Carrots raw ½ carrot) or cooked carrot (1/2 cup)              |                                          |                      |                   |                     |                     |                  |                    |                    |                    |
| Corn (1/2 cup)                                                |                                          |                      |                   |                     |                     |                  |                    |                    |                    |
| Onions as a garnish or in salad (1 slice) or cooked (1/2 cup) |                                          |                      |                   |                     |                     |                  |                    |                    |                    |
| Peppers (1/4 small)                                           |                                          |                      |                   |                     |                     |                  |                    |                    |                    |
| Eggplant, zucchini or summer squash (1/2 cup)                 |                                          |                      |                   |                     |                     |                  |                    |                    |                    |
| Spinach cooked (1/2 cup)                                      |                                          |                      |                   |                     |                     |                  |                    |                    |                    |
| Spinach raw (1 cup)                                           |                                          |                      |                   |                     |                     |                  |                    |                    |                    |
| Icebergs or leaf lettuce (1 serving)                          |                                          |                      |                   |                     |                     |                  |                    |                    |                    |
|                                                               | <b>Never or less than once per month</b> | <b>1-3 per month</b> | <b>1 per week</b> | <b>2-4 per week</b> | <b>5-6 per week</b> | <b>1 per day</b> | <b>2-3 per day</b> | <b>4-5 per day</b> | <b>6 + per day</b> |
| <b>Eggs, meat, ETC.</b>                                       |                                          |                      |                   |                     |                     |                  |                    |                    |                    |
| Eggs (1)                                                      |                                          |                      |                   |                     |                     |                  |                    |                    |                    |
| Beef steak or roast (113-170g)                                |                                          |                      |                   |                     |                     |                  |                    |                    |                    |
| Chicken (85g) or chicken/turkey sandwich                      |                                          |                      |                   |                     |                     |                  |                    |                    |                    |
| Hamburger (1 patty)                                           |                                          |                      |                   |                     |                     |                  |                    |                    |                    |
| Pork or ham (113-170g)                                        |                                          |                      |                   |                     |                     |                  |                    |                    |                    |
| Fish (85-141 g)                                               |                                          |                      |                   |                     |                     |                  |                    |                    |                    |
| Bacon (2 slices)                                              |                                          |                      |                   |                     |                     |                  |                    |                    |                    |
| Hot-dog (1)                                                   |                                          |                      |                   |                     |                     |                  |                    |                    |                    |
| Tuna steak (85-141g), canned tuna (85-113g)                   |                                          |                      |                   |                     |                     |                  |                    |                    |                    |

|                                                                |                                   |               |            |              |              |           |             |             |             |
|----------------------------------------------------------------|-----------------------------------|---------------|------------|--------------|--------------|-----------|-------------|-------------|-------------|
| Shrimp, lobster (85-141g)                                      |                                   |               |            |              |              |           |             |             |             |
| <b>Breads, cereals, starches</b>                               |                                   |               |            |              |              |           |             |             |             |
| Cooked Cornflakes (1 cup) or cold breakfast cereal (1 serving) |                                   |               |            |              |              |           |             |             |             |
| Whole bread/white bread (1 slice)                              |                                   |               |            |              |              |           |             |             |             |
| Bagels or Muffins (1)                                          |                                   |               |            |              |              |           |             |             |             |
| Biscuits (1)                                                   |                                   |               |            |              |              |           |             |             |             |
| Manakish (150g) or flayer (25g)                                |                                   |               |            |              |              |           |             |             |             |
| Brown or white rice (cooked) (1 cup)                           |                                   |               |            |              |              |           |             |             |             |
| Spaghetti, noodles (cooked) (1 cup)                            |                                   |               |            |              |              |           |             |             |             |
| Potatoes, baked or boiled (1 cup)                              |                                   |               |            |              |              |           |             |             |             |
| Potato chips (30 g) or French fries (170g)                     |                                   |               |            |              |              |           |             |             |             |
| 2 slices pizza                                                 |                                   |               |            |              |              |           |             |             |             |
|                                                                | Never or less than once per month | 1-3 per month | 1 per week | 2-4 per week | 5-6 per week | 1 per day | 2-3 per day | 4-5 per day | 6 + per day |
| <b>Beans</b>                                                   |                                   |               |            |              |              |           |             |             |             |
| Peas (1/2 cup)                                                 |                                   |               |            |              |              |           |             |             |             |
| Beans, lima beans, fresh (1/2 cup)                             |                                   |               |            |              |              |           |             |             |             |
| Lentils, fresh (1/2 cup)                                       |                                   |               |            |              |              |           |             |             |             |
| Chickpeas, fresh (1/2 cup)                                     |                                   |               |            |              |              |           |             |             |             |
| <b>Beverages</b>                                               |                                   |               |            |              |              |           |             |             |             |
| Coke, carbonated beverage (1 can)                              |                                   |               |            |              |              |           |             |             |             |
| Sugar- free beverage (1 can) or 1 bottle                       |                                   |               |            |              |              |           |             |             |             |
| Sport drink (1 can)                                            |                                   |               |            |              |              |           |             |             |             |
| Beer, regular (1 can or 1 bottle)                              |                                   |               |            |              |              |           |             |             |             |

|                                                            |                                          |                      |                   |                     |                     |                  |                    |                    |                    |
|------------------------------------------------------------|------------------------------------------|----------------------|-------------------|---------------------|---------------------|------------------|--------------------|--------------------|--------------------|
| Red/white wine (140g)                                      |                                          |                      |                   |                     |                     |                  |                    |                    |                    |
| Liquor, e.g., vodka, gin, etc. (un shot or 1 drink)        |                                          |                      |                   |                     |                     |                  |                    |                    |                    |
| Tea or coffee (including decaffeinated one) (226g, 1 cup)  |                                          |                      |                   |                     |                     |                  |                    |                    |                    |
| Dairy coffee drink (hot/cold),e.g., Cappuccino (453g)      |                                          |                      |                   |                     |                     |                  |                    |                    |                    |
| Plain water: bottled, sparkling or tap (227g)              |                                          |                      |                   |                     |                     |                  |                    |                    |                    |
| <b>Sweets, baked goods, Miscellaneous</b>                  | <b>Never or less than once per month</b> | <b>1-3 per month</b> | <b>1 per week</b> | <b>2-4 per week</b> | <b>5-6 per week</b> | <b>1 per day</b> | <b>2-3 per day</b> | <b>4-5 per day</b> | <b>6 + per day</b> |
| Milk chocolate (30 g)                                      |                                          |                      |                   |                     |                     |                  |                    |                    |                    |
| Dark chocolate (30 g)                                      |                                          |                      |                   |                     |                     |                  |                    |                    |                    |
| Doughnuts (1)                                              |                                          |                      |                   |                     |                     |                  |                    |                    |                    |
| Cake or pie, homemade or ready-made or Arabic pastries (1) |                                          |                      |                   |                     |                     |                  |                    |                    |                    |
| Jams, honey, jellies, syrup, halawa, molasses (1 Tbs)      |                                          |                      |                   |                     |                     |                  |                    |                    |                    |
| Ketchup or red chili sauce (1 Tbs), tomato soup (1 cup)    |                                          |                      |                   |                     |                     |                  |                    |                    |                    |
| Peanuts, walnuts or other nuts (30g)                       |                                          |                      |                   |                     |                     |                  |                    |                    |                    |
| Vegetable oil (1 Tbs), olives (10-16)                      |                                          |                      |                   |                     |                     |                  |                    |                    |                    |
| Garlic, fresh or powdered (1 clove or 4 shakes)            |                                          |                      |                   |                     |                     |                  |                    |                    |                    |
| Mayonnaise or Mustard (1 Tbs)                              |                                          |                      |                   |                     |                     |                  |                    |                    |                    |
| Tahini (1 Tbs)                                             |                                          |                      |                   |                     |                     |                  |                    |                    |                    |
| Energy or high protein Bars (1), snack bars (1)            |                                          |                      |                   |                     |                     |                  |                    |                    |                    |
| Popcorn (2-3 cups)                                         |                                          |                      |                   |                     |                     |                  |                    |                    |                    |

dd/mm/yy

**Questionnaire of the study: Nutritional profile of NAFLD Lebanese patients: a case control study**  
**(Exclusion Criteria)**

*These questions are designed to be filled or to be ticked according to the appropriate answer*

**Identification number.....**

**Phone Number.....**

**6. Socio-demographic variables**

12) Nationality.....

13) Place of residency.....

14) Place of birth.....

15) Age: .....

16) Gender

1. Female

2. Male

**7. For each alcoholic beverage, tick the box indicating how often on average you have used the amount specified during the past year**

|                                                                           | Never or less than<br>once per month | 1-3 per<br>month | 1 per<br>week | 2-4 per<br>week | 5-6 per<br>week | 1 per<br>day | 2-3 per<br>day | 4-5<br>per<br>day | 6 +<br>per<br>day |
|---------------------------------------------------------------------------|--------------------------------------|------------------|---------------|-----------------|-----------------|--------------|----------------|-------------------|-------------------|
| <b>Beverages</b>                                                          |                                      |                  |               |                 |                 |              |                |                   |                   |
| Aperitif with alcohol                                                     |                                      |                  |               |                 |                 |              |                |                   |                   |
| Arak (1 glass of arak)                                                    |                                      |                  |               |                 |                 |              |                |                   |                   |
| Light beer (1 glass,<br>bottle, can)                                      |                                      |                  |               |                 |                 |              |                |                   |                   |
| Beer, regular (1 glass, 1<br>can or 1 bottle)                             |                                      |                  |               |                 |                 |              |                |                   |                   |
| Red/white wine (140g)                                                     |                                      |                  |               |                 |                 |              |                |                   |                   |
| Liquor, e.g., vodka, gin,<br>whisky, cognac etc. (one<br>shot or 1 drink) |                                      |                  |               |                 |                 |              |                |                   |                   |

**8. Blood tests (exclusion criteria)**

HCV Ab.....

HBs Ag .....

HEV Ab.....

Ac HBc Total.....

AMA (Anti-Mitochondrial antibody) .....

$\alpha$  1 anti trypsin (g/l).....

ANA (antinuclear antibody).....

Anti LKM (liver kidney microsome) .....

Ceruloplasmin (g/l) .....

Ferritin (ng/ml) .....

Transferrin saturation (%)......

**9. Did you take any of these medications the last six months?**

1. yes      2. No

**If yes, did you take?**

- |                              |        |       |
|------------------------------|--------|-------|
| 1) Amiodarone                | 1. yes | 2. No |
| 2) How often/week/day .....  |        |       |
| 3) Antiretroviral drugs      | 1. yes | 2. No |
| 4) How often/week/day .....  |        |       |
| 5) Aspirine                  | 1. yes | 2. No |
| 6) How often/week/day .....  |        |       |
| 7) Corticosteroids           | 1. yes | 2. No |
| 8) How often/week/day .....  |        |       |
| 9) Methotrexate              | 1. yes | 2. No |
| 10) How often/week/day ..... |        |       |
| 11) Tamoxifen                | 1. yes | 2. No |
| 12) How often/week/day ..... |        |       |
| 13) IV Tetracycline          | 1. yes | 2. No |
| 14) How often/week/day ..... |        |       |
| 15) Synthetic estrogens      | 1. yes | 2. No |
| 16) How often/week/day       |        |       |
| 17) Others                   | 1. yes | 2. No |
| 18) How often/week/day       |        |       |

**10. Day/week**

- 5) 1
- 6) 2-3
- 7) 4-5
- 8) 6+

**11. Have you had any of these clinician -diagnosed illnesses**

- 1) Diabetes type 1
- 2) Ulcerative colitis/Crohn's
- 3) Gall bladder stones or any biliary diseases
- 4) Genetic metabolic disease
- 5) Auto-immune liver diseases
- 6) Recognized cirrhosis
- 7) Infection with Hepatitis A, B or C
- 8) Enteral or parenteral nutrition
- 9) Banding or jejunoileal bypass surgery
- 10) Polycystic ovary (female)

**7. Are you pregnant (*female*)?**                      1. yes      2. No
